# Supplementary material for: Exploring the Behavioural Intentions of Men with Prostate Cancer Toward the Use of Complementary and Alternative Medicine: A Study at Korle-Bu Teaching Hospital
Source: Research Square preprint supplement (doi:10.21203/rs.3.rs-7235147/v1), 2025-09-22
Supplement: Supplementary file 1 [file 595ce87df9265afcab26cc0a.pdf]

## Appendix III: Interview Guide

### Pseudonym/Coding.....

#### Section A: Demographic Information

1. Age 30 – 39 ( ), 40 – 49 ( ), 50 – 59 ( ), 60 – 69 ( ), 70 – 79 ( )
2. Occupation
3. Educational status
4. Marital status
5. Residence
6. Nationality
7. Tribe
8. Language (s) speaking
9. Religion

#### Section B: Perceptions about CAM use

1. Tell me what you know about CAM?

##### *Probe*

- i. What are the types?
  - ii. what are examples?
  - iii. How are they used?
2. What do you think could influence a man with prostate cancer to use CAM either at home or in the hospital?

##### *Probe*

- i. Availability
- ii. Education

iii. Policies

3. What do you think are some of the intentions of people who use CAM as a treatment option?

***Probe***

i. Nature

ii. Safety

iii. Purpose

4. Please tell me some particular traditional or herbal medicines you have use or seen other people used/using within your sociocultural context?

***Probe***

i. Period of practice

ii. Effects

5. What are your views on the CAM therapies?

***Probe***

i. Availability

ii. Cost

iii. Effectiveness

iv. Patronage

6. Tell me some challenges associated with CAM use?

***Probe***

i. Cost

ii. Practicality

iii. Time

7. What do you think of people who advocate or recommend the use of CAM for treatment?

***Probe***

- i. Practicality
  - ii. Recording
  - iii. Continue of care
8. What recommendations will you make in relation to the usage of CAM?
9. Please, is there anything you would like to tell me?

Thank You
